# Supplementary material
Source: PubMed Central journal article supplement (PMC3977307)
Supplement: 1320045111_sapp.pdf [file 1320045111_sapp.pdf]

# Supporting information

## Tuning the Threshold Voltage of Carbon Nanotube Transistors by n-Type Molecular Doping for Robust and Flexible Complementary Circuits

Huiliang Wang<sup>1,#</sup>, Peng Wei<sup>2,#</sup>, Yaoxuan Li<sup>3</sup>, Jeff Han<sup>2</sup>, Hye Ryoung Lee<sup>3</sup>, Benjamin D. Naab<sup>4</sup>, Nan Liu<sup>2</sup>, Chenggong Wang<sup>5</sup>, Eric Adijanto<sup>2</sup>, Benjamin C-K. Tee<sup>3</sup>, Satoshi Morishita<sup>2</sup>, Qiaochu Li<sup>2</sup>, Yongli Gao<sup>5</sup>, Yi Cui<sup>1</sup>, Zhenan Bao<sup>2</sup>

<sup>1</sup> Department of Materials Science and Engineering, <sup>2</sup> Department of Chemical Engineering, <sup>3</sup> Department of Chemical Engineering, <sup>4</sup> Department of Chemistry, Stanford University, California 94305, USA. <sup>5</sup> Department of Physics and Astronomy, University of Rochester, Rochester, NY 14627, USA

# These authors contributed equally.

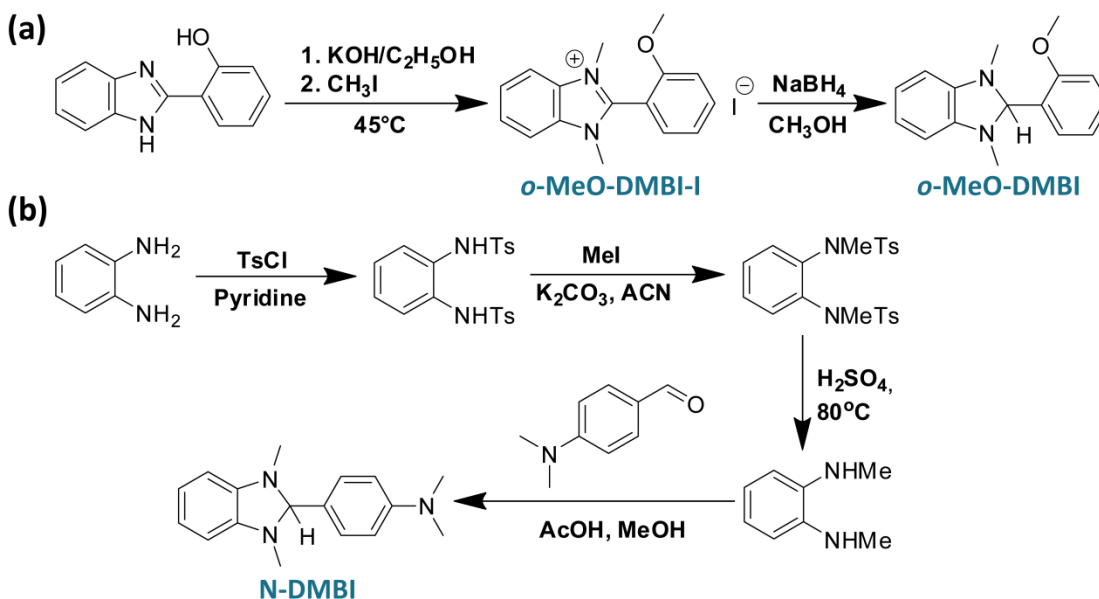

**Figure S1.** Synthesis schemes for a) o-MeO-DMBI-I, o-MeO-DMBI and b) N-DMBI.

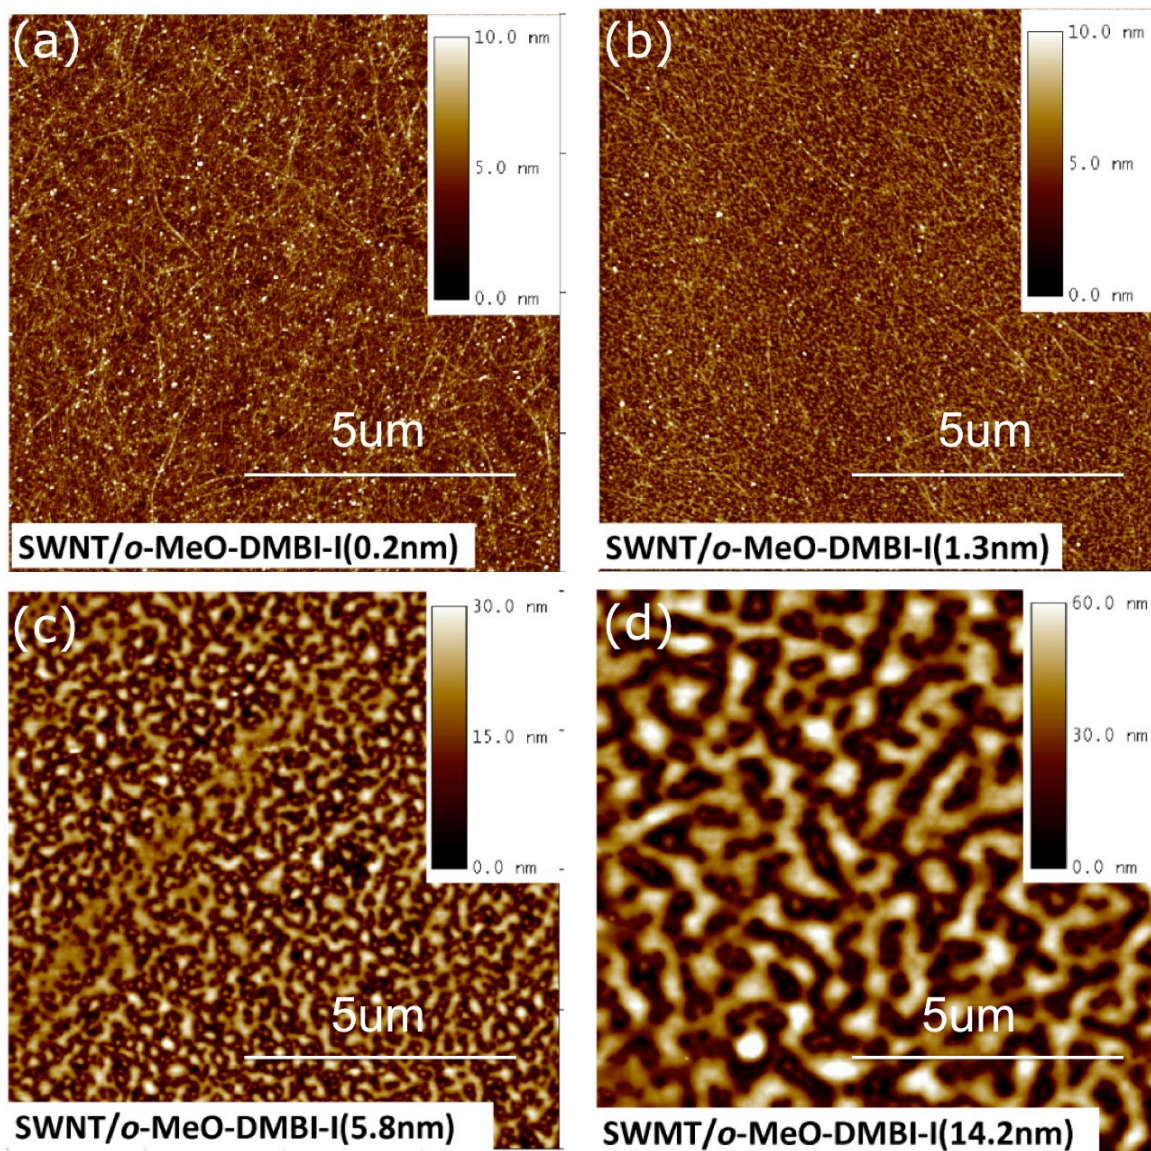

**Figure S2.** Tapping mode AFM images of SWNT networks with a) 0.2 nm, b) 1.3 nm, c) 5.8 nm, and d) 14.2 nm dopant layer thicknesses, using *o*-MeO-DMBI-I as the dopant.

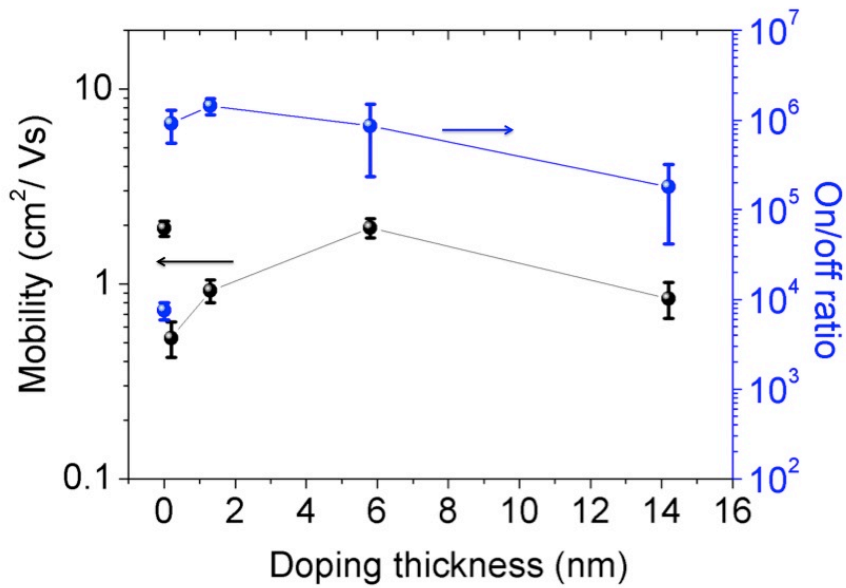

**Figure S3.** Mobility and on/off ratio of undoped and doped sc-SWNT devices as a functional of the thickness of *o*-MeO-DMBI-I. Five devices were characterized for each doping thickness, with error bars showing the standard deviation from the average value.

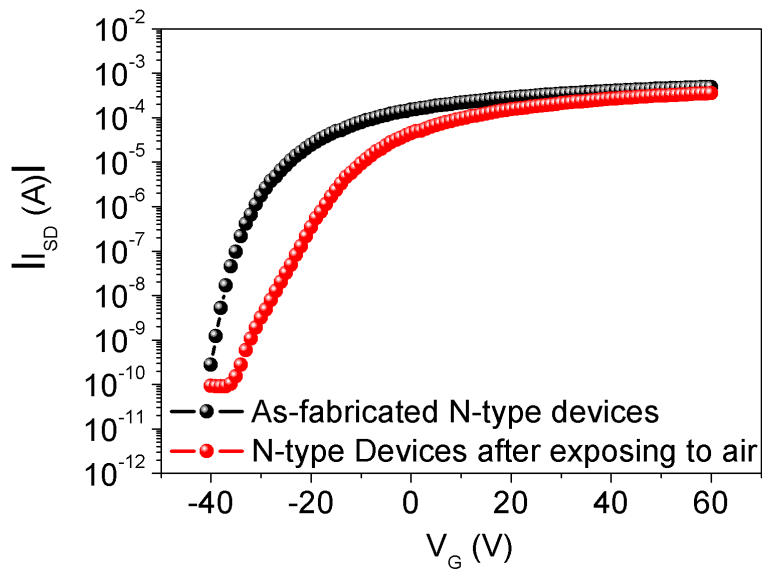

**Figure S4.** SWNT TFT doped by 3nm *o*-MeO-DMBI-I, measured just after doping (black curve) or after exposing to air for a week (red curve). Both devices were measured under N<sub>2</sub> atmosphere in glovebox.

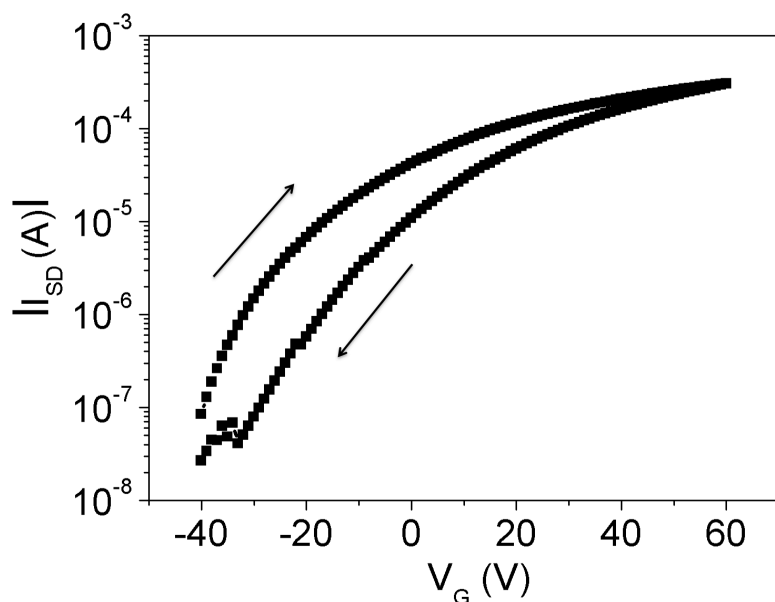

**Figure S5.** Hysteresis of an n-doped SWNT TFT doped by 3nm *o*-MeO-DMBI-I.

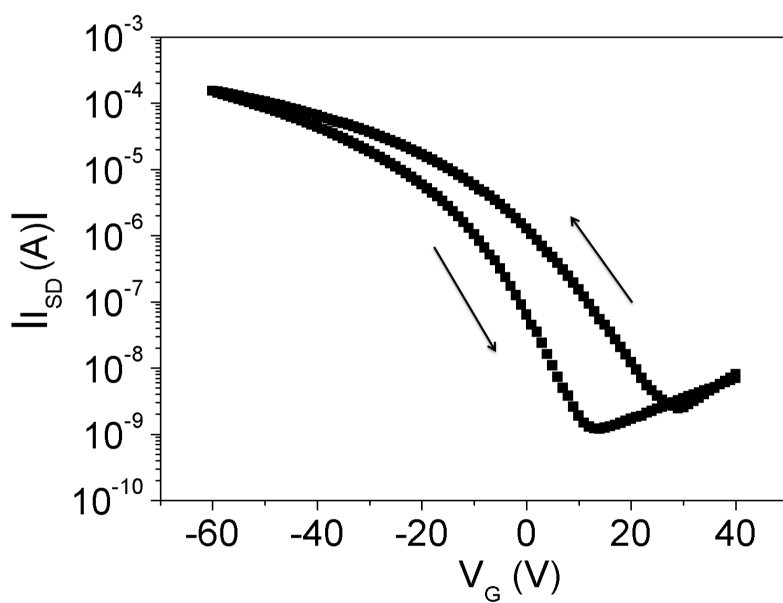

**Figure S6.** Hysteresis of an un-doped p-type SWNT TFT.

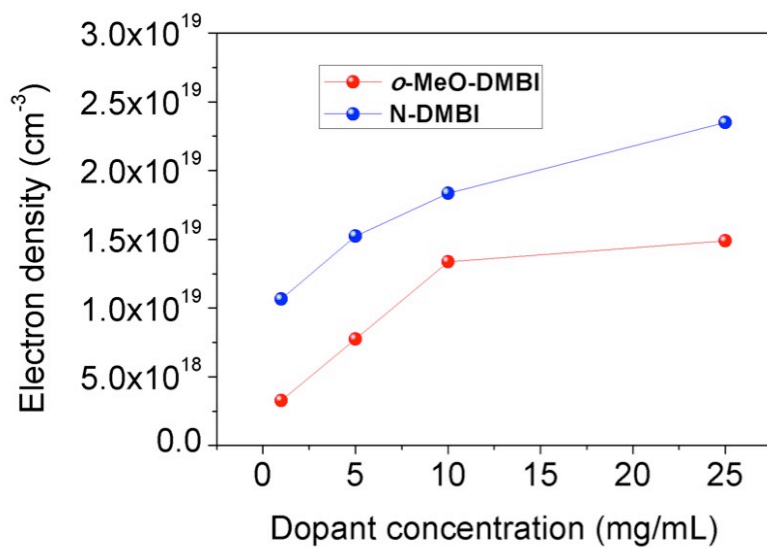

**Figure S7.** Calculated electron carrier density as a function of *o*-MeO-DMBI and N-DMBI concentrations.

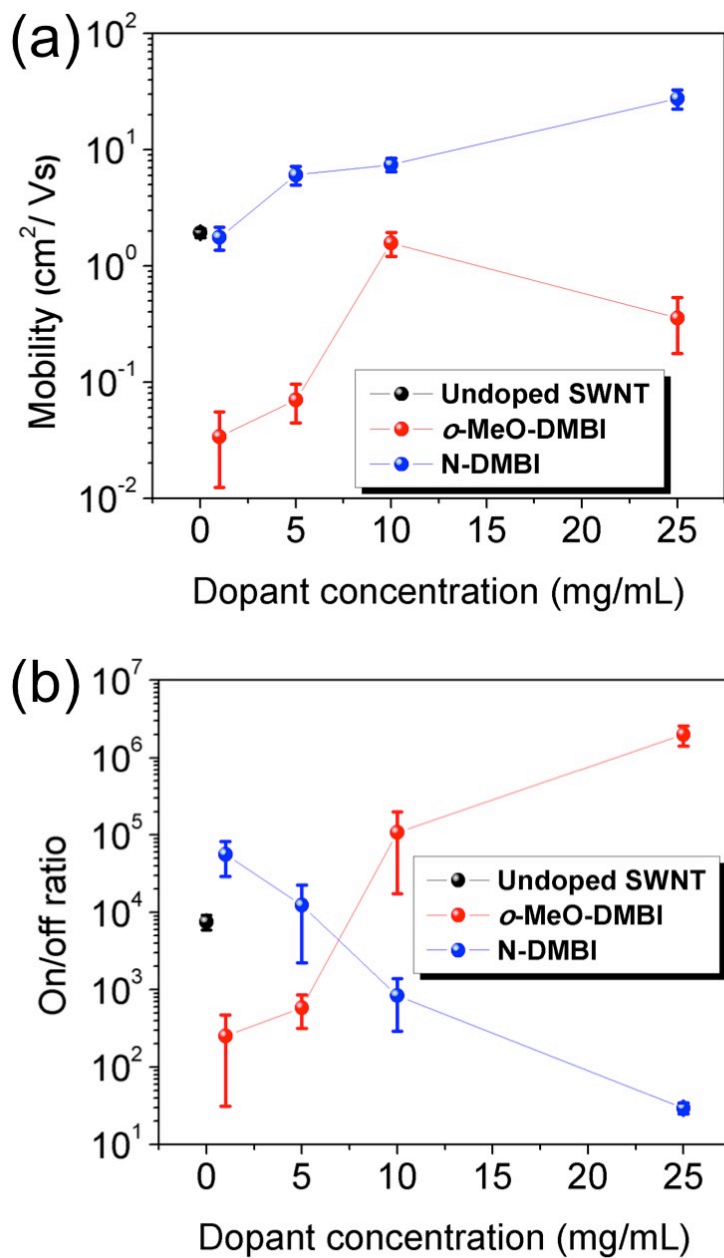

**Figure S8.** (a) Mobility of the undoped and doped sc-SWNT transistors as a function of *o*-MeO-DMBI and N-DMBI solution concentration. (b) On/off ratio of undoped and doped sc-SWNT transistors as a function of *o*-MeO-DMBI and N-DMBI solution concentration. Five devices were characterized for each doping thickness, with error bars showing the standard deviation from the average value.



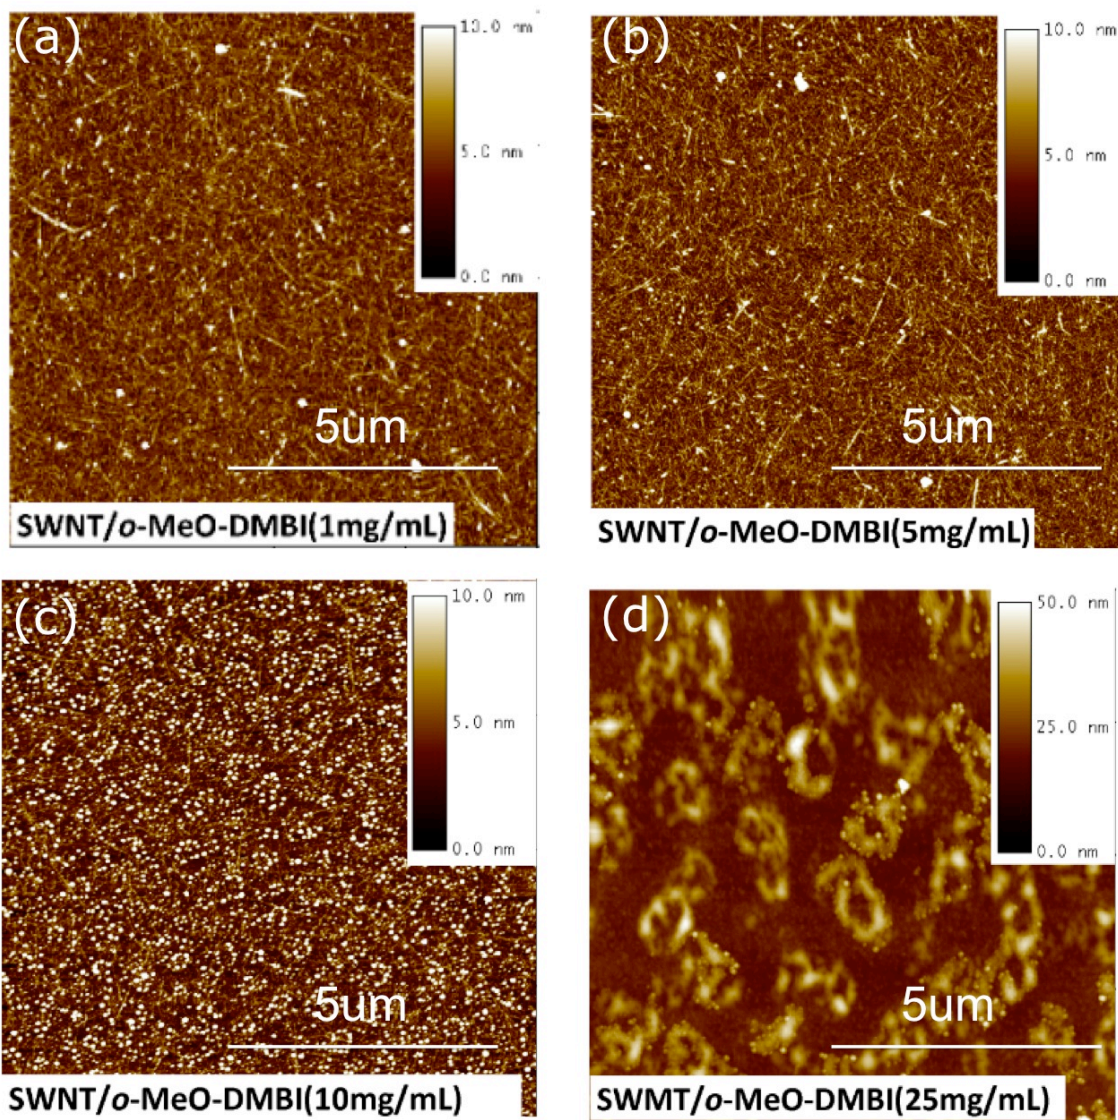

**Figure S9.** Tapping mode AFM images of SWNT networks doped using a) 1 mg/mL, b) 5 mg/mL, c) 10 mg/mL, and d) 25 mg/mL solutions of *o*-MeO-DMBI.



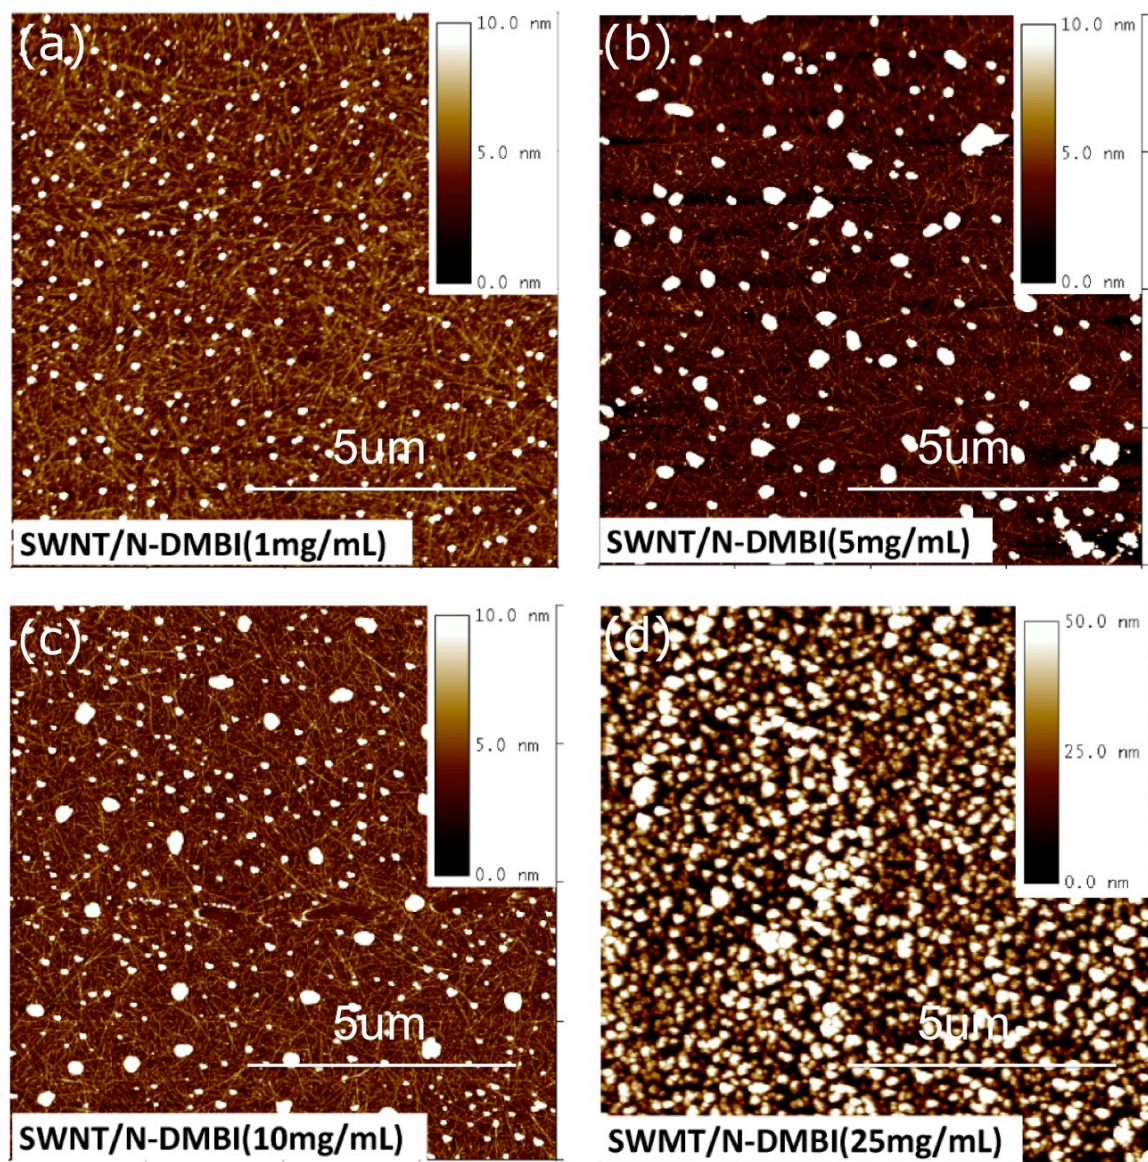

**Figure S10.** Tapping mode AFM images of SWNT networks doped using a) 1 mg/mL, b) 5 mg/mL, c) 10 mg/mL, and d) 25 mg/mL solutions of N-DMBI.



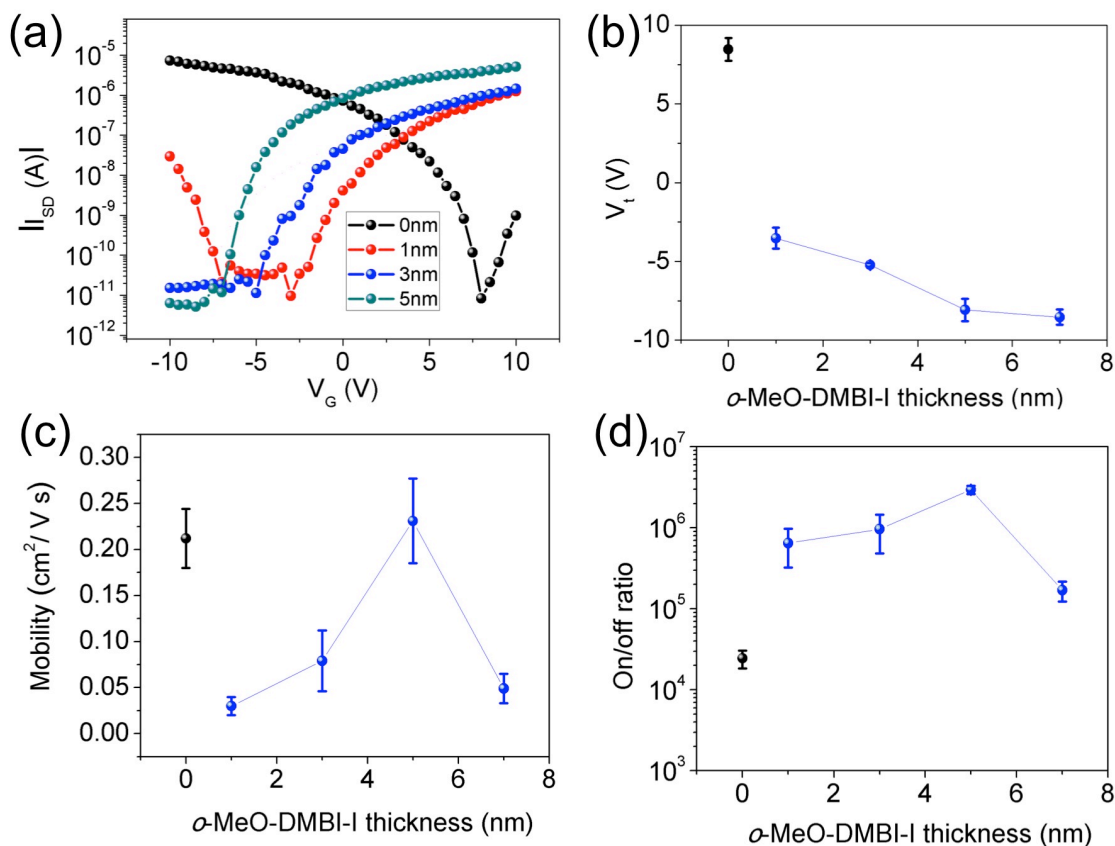

**Figure S11.** Electrical characteristics of n-type doped flexible transistors ( $L = 20 \mu\text{m}$ ,  $W = 400 \mu\text{m}$ ). (a) Transfer characteristics of undoped and doped sc-SWNT transistors as a function of *o*-MeO-DMBI-I layer thickness,  $V_{SD} = 5 \text{ V}$  for n-type and  $V_{SD} = -5 \text{ V}$  for p-type devices. (b) Threshold voltage of undoped and doped sc-SWNT flexible transistors as a function of *o*-MeO-DMBI-I layer thickness. (c) Mobility of the undoped and doped sc-SWNT flexible transistors as a function of *o*-MeO-DMBI-I layer thickness. (d) On/off ratios of the undoped and doped sc-SWNT transistors as a function of *o*-MeO-DMBI-I layer thickness. Five devices were characterized for each doping thickness, with error bars showing the standard deviation from the average value.

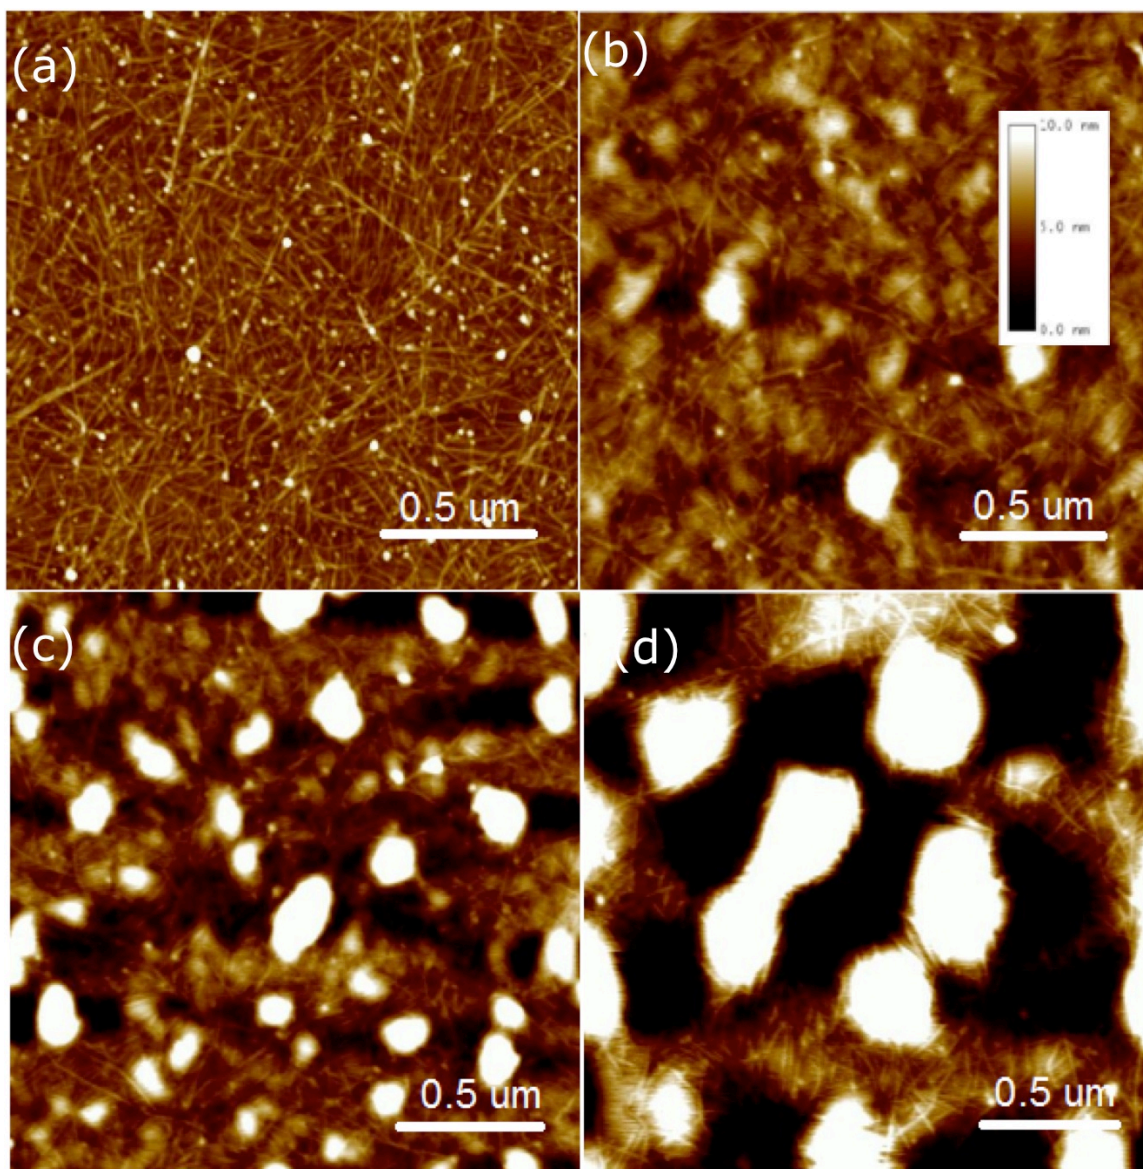

**Figure S12.** Tapping mode AFM images of SWNT networks on flexible substrate with a) 1 nm, b) 3 nm, c) 5 nm, and d) 7 nm dopant thicknesses of *o*-MeO-DMBI-I.
